# Supplementary material for: Reappraisal Value of a Modified Rotational Atherectomy Technique in Contemporary Coronary Angioplasty Era
Source: J Interv Cardiol. 2020 Jan 23;2020:9190702. doi: 10.1155/2020/9190702 (PMC7007738; doi:10.1155/2020/9190702)
Supplement: Supplementary Materials — include the comparison of traditional and modified rotational atherectomy (RA) technique, baseline lesion characteristics, PCI procedure and quantitative coronary angiography (QCA) data, and predictors of target lesion revascularization. Besides, the cumulative incidence curves for adverse events and the comparison of major adverse cardiac events among different PCI strategies are shown in the supplementary figures. [file 9190702.f1.odt]

Supplementary Table 1. Comparison of traditional and modified RA technique

Traditional
Modified
Initial burr size 
Plaque modification with small burrs (1.25 mm to 1.5 mm) as initial strategy is default position. 
1)≧1.75 mm if IVUS/OCT can cross the lesion；
2)≦1.5 mm if IVUS/OCT can not cross the lesion.
Ablation speed
Plaque modification usually achieved at low speeds (135,000 to 180,000 rpm) to reduce risk of complications.
Pass at "high" speed (160,000–220,000 rpm);
then polish at “low” speed (140,000–160,000 rpm).
RA flush
Rotablation cocktail with verapamil, nitrates and heparin in saline recommended
Double flush: RA-cocktail shower + intracoronary flush-cocktail from guiding catheter
Burr motion
Pecking motion
Cruising motion


Supplementary Table 2. Baseline lesion characteristics of the patients (n=1169)
Characteristics
No. patients (%) or median (IQR)
De novo lesion
970 (83.0)
ISR lesion
199 (17.0)
Target vessel

LMT
40 (3.4)
LAD
660 (56.5)
 LCX
189 (16.2)
 RCA
298 (25.5)
Extent of the disease

Single vessel disease
759 (64.9)
Double vessel disease
295 (25.2)
Triple vessel disease
115 (9.8)
Bifurcation lesion
640 (54.7)
Ostial lesion
494 (42.3)
CTO
59 (5.0)
Lesion type (AHA)

A
0 (0)
B1
2 (0.2)
B2
189(16.2)
C
978 (83.7)
Pre-QCA

Reference vessel diameter (mm)
2.72 (2.37–3.20)
Lesion length (mm) 
30.67 (22.78–39.91)
Lesion angulation >45°
618 (52.9)
AHA, American Heart Association; CTO, chronic total occlusion; LAD, left anterior descending artery; LCX, left circumflex coronary; LMT, left main trunk; QCA, quantitative coronary angiography; RCA, right coronary artery.  
Supplementary Table 3. PCI procedure and QCA data (n=1169) 
Characteristics
No. Patients (%) or median (IQR)
PCI strategy

RA+DES
798 (68.3)
RA+DCB
59 (5.0)
RA+POBA
312 (26.7)
Guiding catheter ≥7 (F)
596 (51.0)
Femoral approach
550 (47.0)
Fluoroscopy time (min)
25.15(18.73–34.08)
Contrast volume (ml)
188(157–227)
Maximum stent diameter (mm) 
3 (2.50–3.50)
Maximum burr size (mm) 
1.75 (1.50–1.75)
Maximum balloon diameter (mm) 
3 (2.50–3.50)
Maximum balloon pressure (atm) 
20 (14–24)
Maximum burr-to-artery ratio
0.63 (0.55–0.73)
Maximum balloon-to-artery ratio
1.11 (1–1.28)
Maximum stent-to-artery ratio
0.97 (0–1.10)
Minimum rotational speed
140000 (120000–160000)
Total stents length (mm)
38.00 (24 –38)
No. of burrs used (≥2)
402 (34.4)
No. of stents used
1 (0–1)
Immediate QCA

MLD before PCI (mm) 
0.95 (0.70–1.21)
% DS before PCI
63 (56–72)
MLD after PCI (mm)
2.73 (2.31–3.19)
% DS after PCI
2.00 (-7.00–13.00)
Acute gain (mm) 
1.75 (1.36–2.10)
Image device
1065 (91.1)
PCI complications
26 (2.2)
Perforation
20 (1.7)
Slow/no flow
5 (0.4)
Burr trap
1 (0.1)
BMS, bare metal stent; DCB, drug-coated balloon; DES, drug-eluting stent; MLD, minimal lumen diameter; POBA, plain old balloon angioplasty; QCA, quantitative coronary angiography; RA, rota­tional atherectomy; %DS, percent diameter ste­nosis.


Supplementary Table 4. Predictors of target lesion revascularization
Variables
Univariate

Multivariable
cHR
95% CI
P-value

aHR
95% CI
P-value
Demographic characteristics
Age(1-year increase)
0.98
0.96-1.00
0.056


Life behavior
Current smoker
1.33
0.83–2.11
0.237


Medical situation


Hypertension
1.60
0.81-3.16
0.181


Diabetes
1.98
1.40–2.81
<0.001

1.70
1.18–2.47
0.005
Hyperlipidemia
1.11
0.73–1.67
0.627


Hemodialysis
3.68
2.45–5.52
<0.001

3.03
1.96–4.68
<0.001
LVEF
0.97
0.96–0.99
0.001

0.99
0.97–1.01
0.066
Lesion characteristics


Reference vessel diameter
1.36
1.05-1.76
0.021


Lesion length
0.99
0.99–1.01
0.907


Treatment


PCI strategy


RA+DES (Ref)
1.00


1.00


RA+DCB
4.81
2.74–8.45
<0.001

4.53
2.54–8.06
<0.001
RA+POBA
3.17
2.20–4.58
<0.001

2.76
1.87–4.08
<0.001
Maximum burr/artery ratio
2.57
0.95–6.99
0. 064


MLD after PCI
0.84
0.62–1.12
0. 237


Statin used
1.33
0.94–1.90
0.112


aHR, adjusted hazard ratios; CI, confidence interval; cHR, crude hazard ratios; DCB, drug-coated balloon; DES, drug-eluting stent; LVEF, left ventricular ejection fraction; MLD, minimal lumen diameter; POBA, plain old balloon angioplasty; RA, rota­tional atherectomy.

 
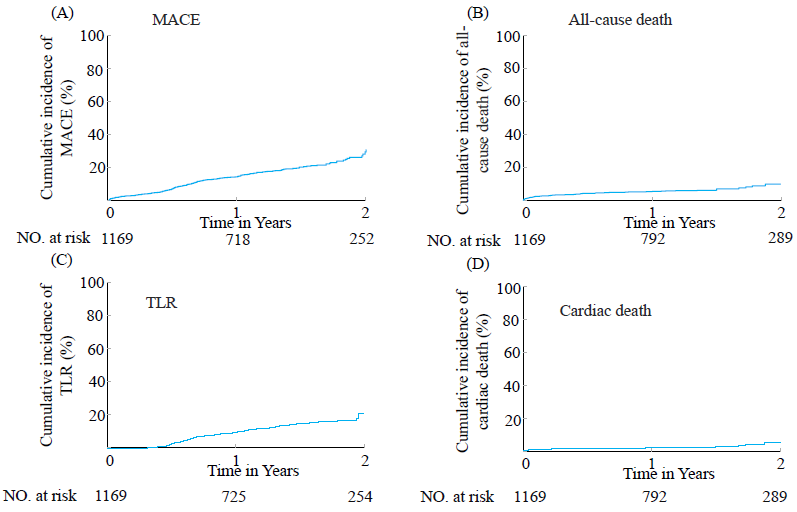
Supplementary Figure 1. Cumulative incidence curves for (A) major adverse cardiac events (MACE), (B) all-cause death, (C) target lesion revascularization (TLR) and (D) cardiac death.


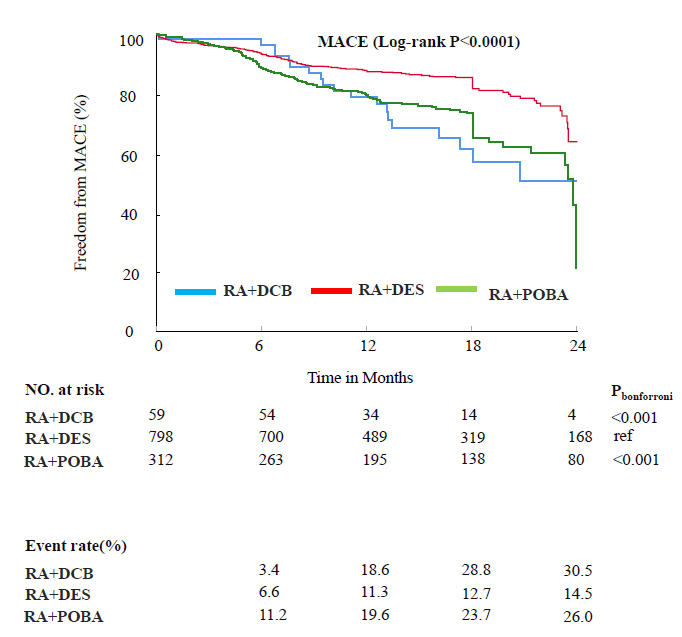
Supplementary Figure 2. Comparison of MACE among different PCI strategies. DCB, drug-coated balloon; DES, drug-eluting stent; MACE, major adverse cardiac events; POBA, plain old balloon angioplasty; RA, rota­tional atherectomy.
